# Supplementary material
Source: ML conference proceedings conference paper supplement (https://openaccess.thecvf.com/content/CVPR2023/html/Plesh_GlassesGAN_Eyewear_Personalization_CVPR_2023_paper.html)
Supplement: Supplementary file 1 [file Plesh_GlassesGAN_Eyewear_Personalization_CVPR_2023_supplemental.zip]

Archive with 2 entries (2 files):
- glasses_edit.mp4
- GlassesGAN_CVPR_short.pdf
